# Supplementary material for: miR 31-3p Has the Highest Expression in Cesarean Scar Endometriosis
Source: MDPI journal article supplement (doi:10.3390/ijms23094660), 2022-04-22

### Figure S2. Correlations.

In DIE miR-1-3p correlated positively with miR-125b-1-3p ( $R=0.738$ ;  $p=0.037$ ; Spearman correlation). In SE miR-125b-1-3p correlated positively with miR-548d ( $R=0.484$ ;  $p=0.02$ ) and miR-31-3p ( $R=0.417$ ;  $p=0.043$ ) and miR-200b-3p correlated positively with miR-31-3p ( $R=0.38$ ;  $P=0.01$ ). In OE miR-502 correlated positively with miR-503 ( $R=0.402$ ,  $p=0.005$ ) and miR-548d ( $R=0.527$ ,  $p=0.001$ ).

DIE:

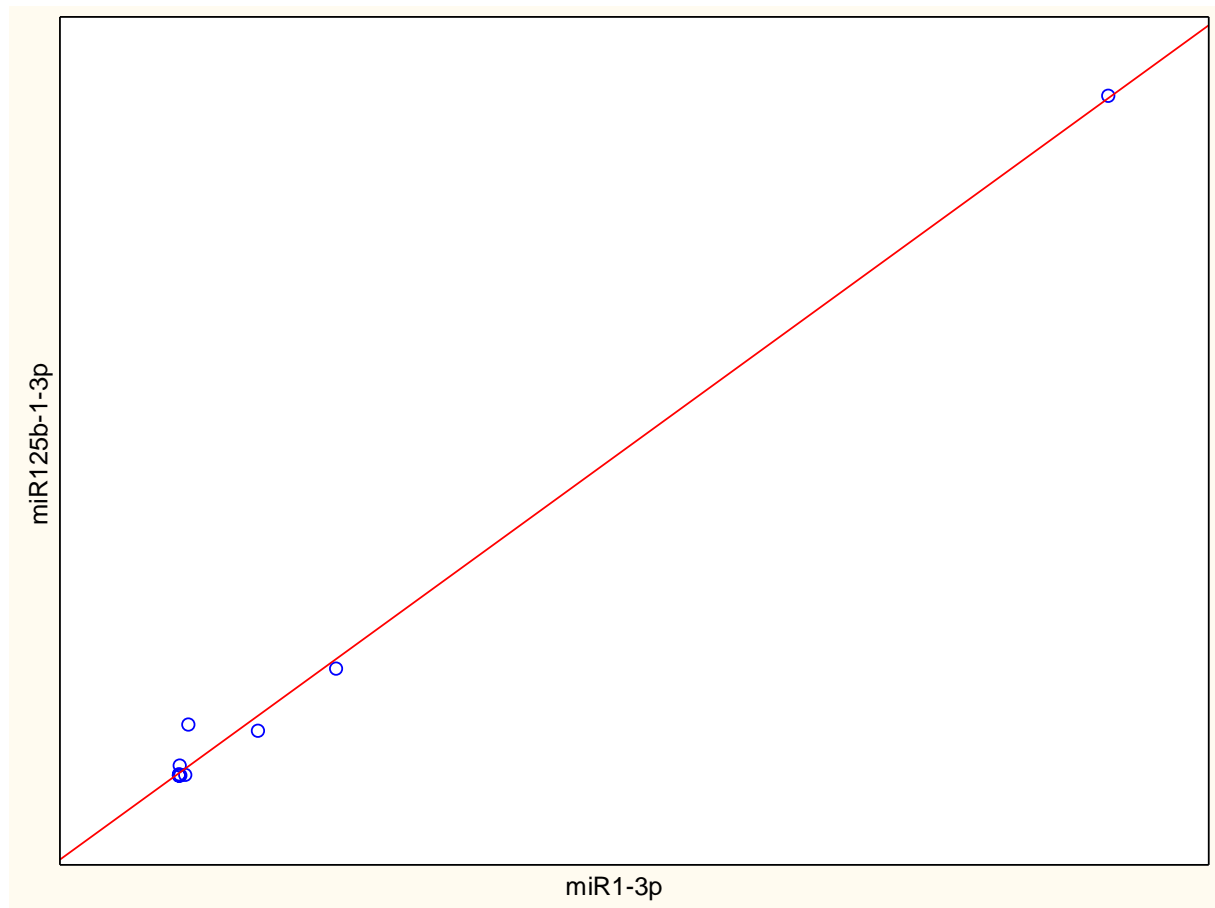

SE:

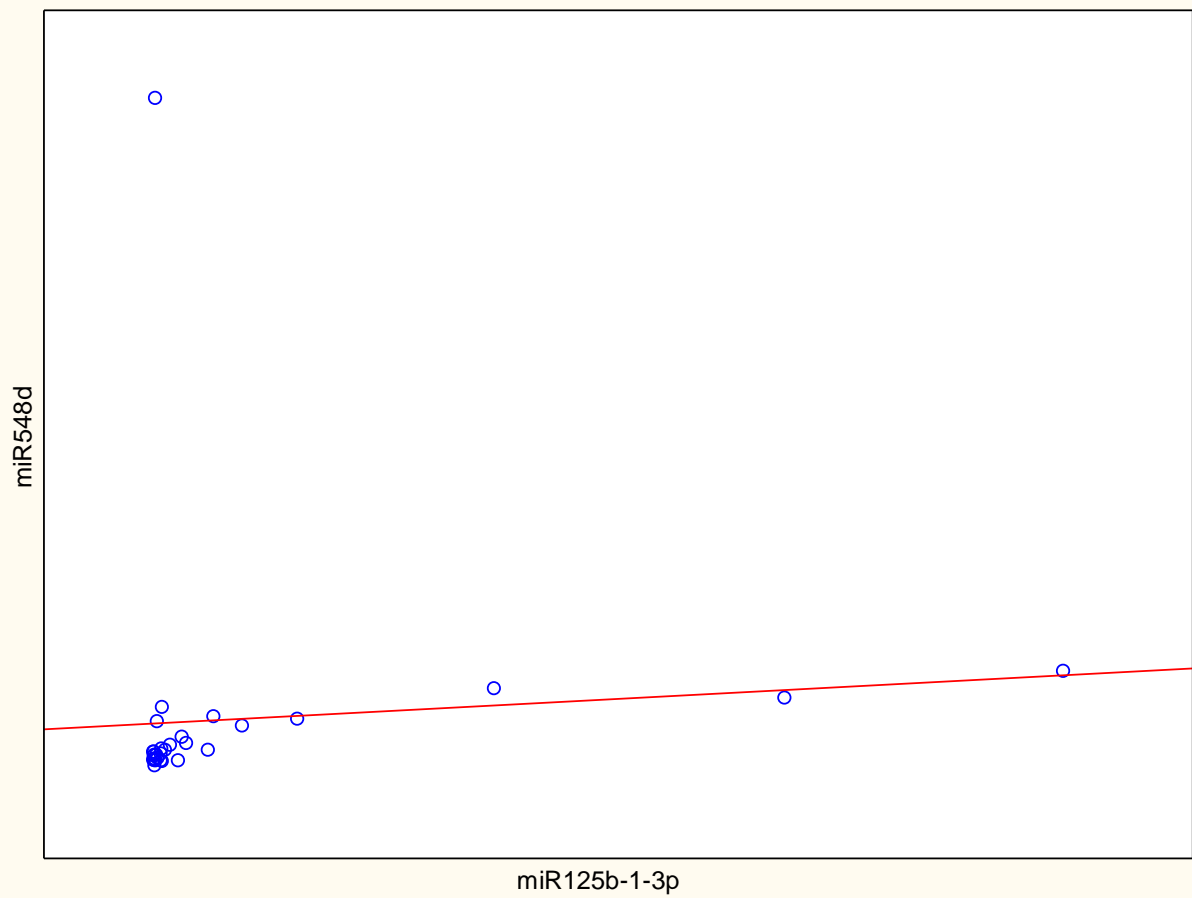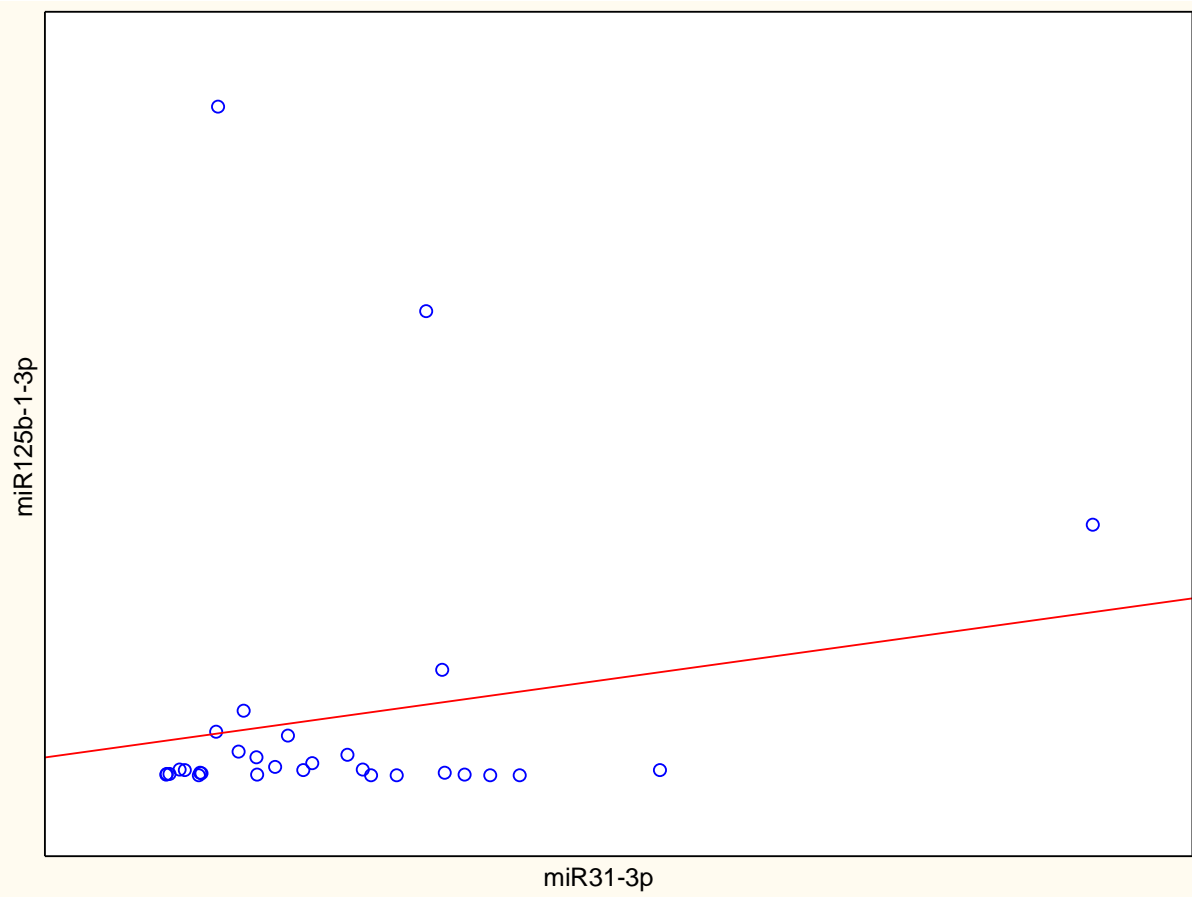

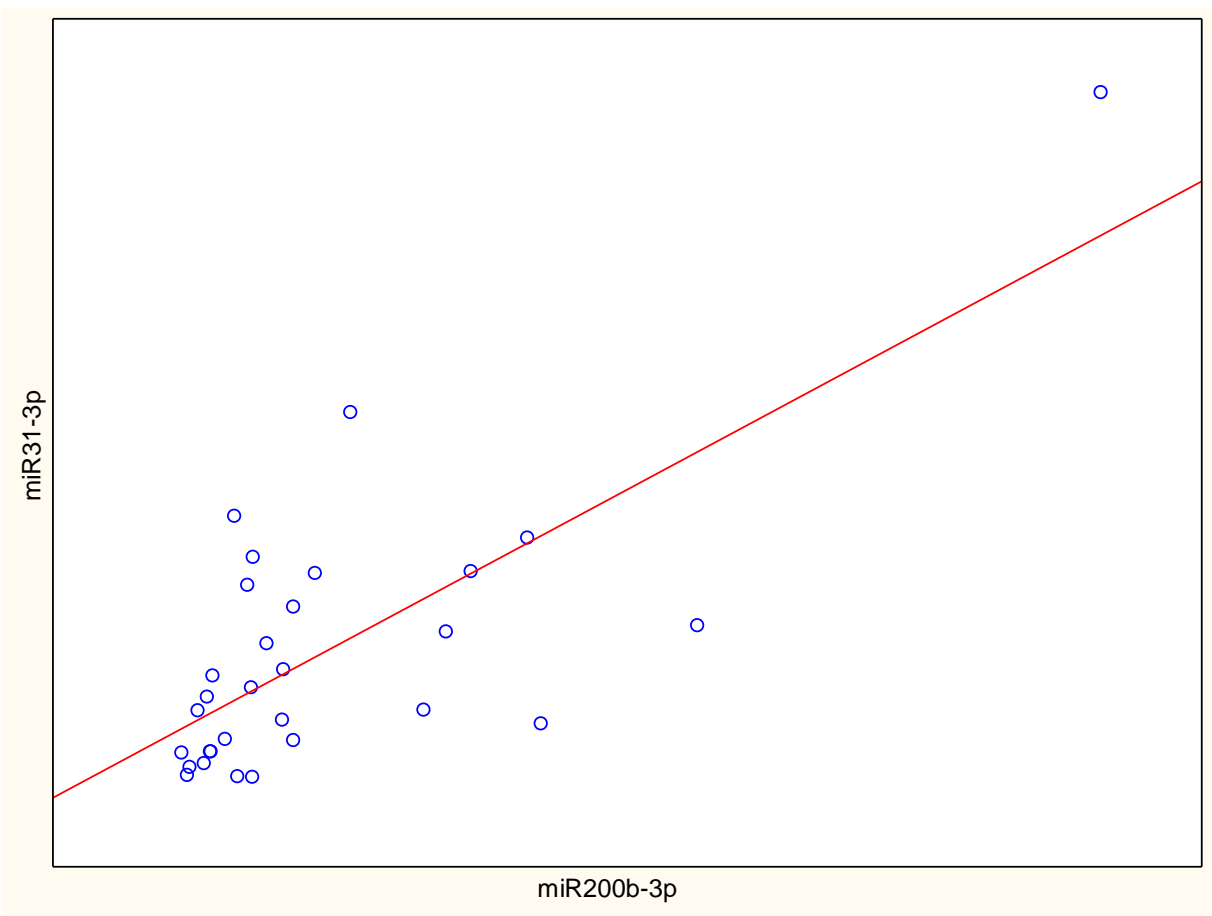

OE:

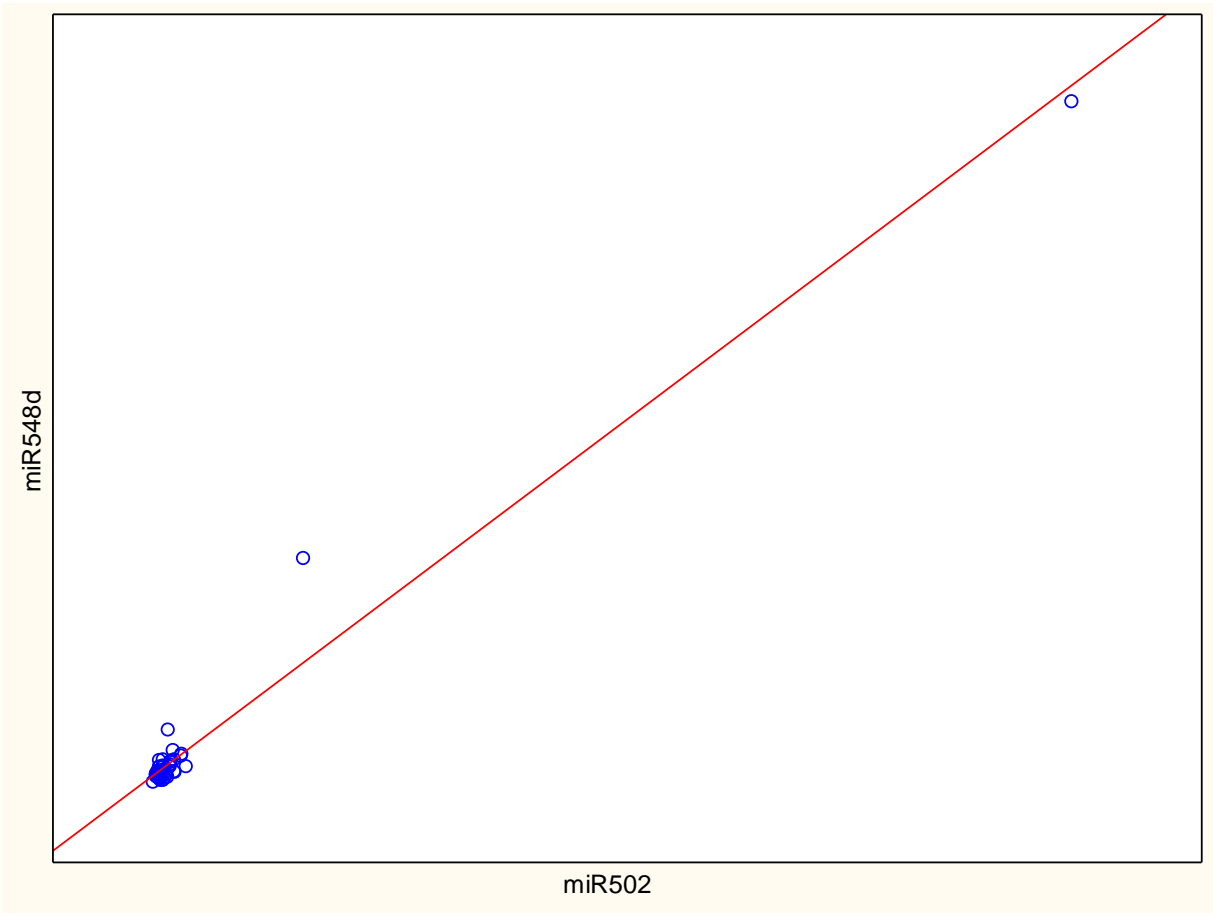

miR502

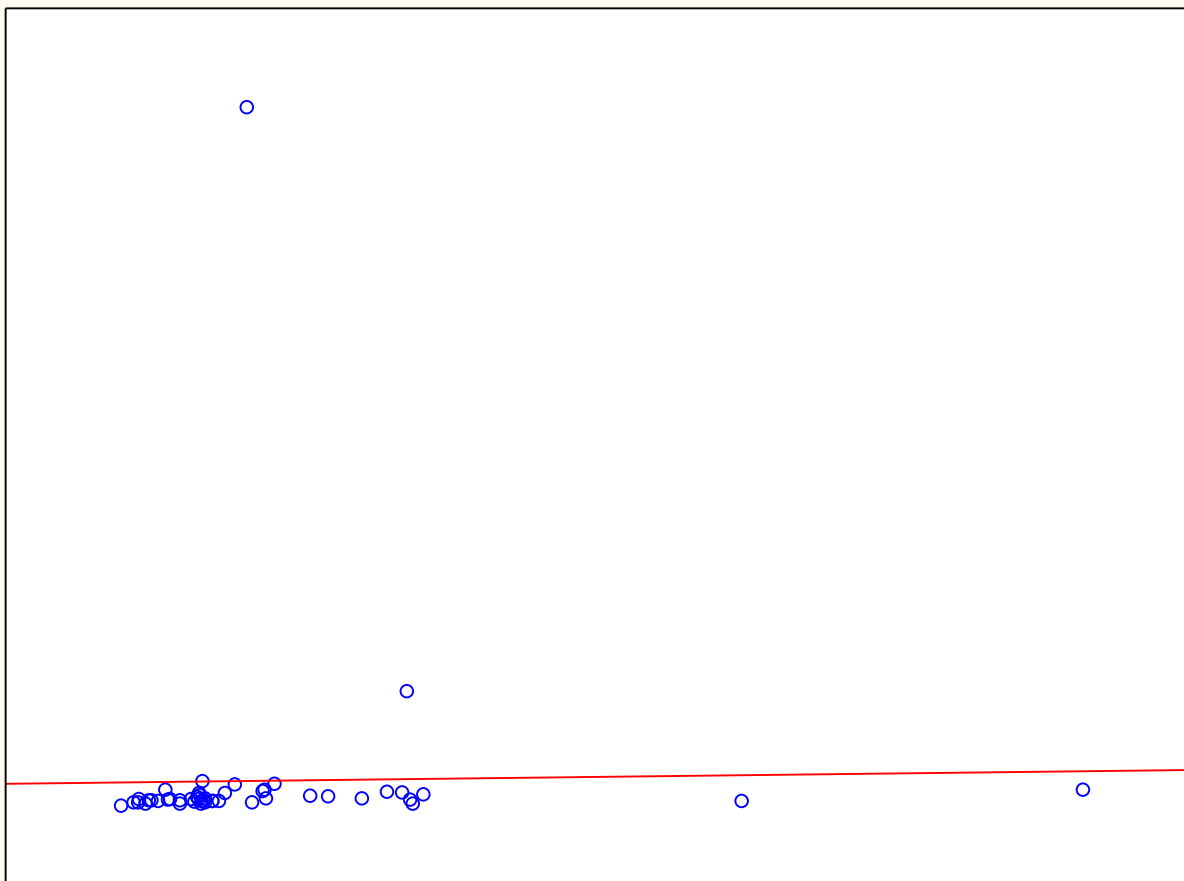

Supplement: s1 [file s1]
