# Supplementary material for: miR 31-3p Has the Highest Expression in Cesarean Scar Endometriosis
Source: MDPI journal article supplement (doi:10.3390/ijms23094660), 2022-04-22
Supplement: s1 [file s1]

|                               | mean   | median | min  | max  | SD     |
|-------------------------------|--------|--------|------|------|--------|
| <b>Age [years]</b>            |        |        |      |      |        |
| DIE                           | 36.28  | 33.5   | 25.0 | 57.0 | 9.425  |
| OE                            | 38.91  | 35.0   | 19.0 | 84.0 | 13.51  |
| SE                            | 36.367 | 36.0   | 26.0 | 48.0 | 5.61   |
| CG                            | 58.091 | 56.0   | 31.0 | 88.0 | 12.523 |
| <b>BMI [kg/m<sup>2</sup>]</b> |        |        |      |      |        |
| DIE                           | 23.321 | 23.6   | 18.7 | 32.5 | 3.446  |
| OE                            | 25.209 | 24.3   | 19.5 | 37.3 | 3.914  |
| SE                            | 27.743 | 24.95  | 18.4 | 38.5 | 14.342 |
| CG                            | 27.545 | 26.3   | 23.0 | 39.2 | 4.047  |
| <b>Vaginal deliveries</b>     |        |        |      |      |        |
| DIE                           |        |        |      |      |        |
| OE                            | 0.714  | 0.5    | 0.0  | 3.0  | 0.914  |
| SE                            | 0.681  | 0.0    | 0.0  | 4.0  | 1.002  |
| CG                            | 0.133  | 0.0    | 0.0  | 1.0  | 0.346  |
|                               | 1.515  | 2.0    | 0.0  | 4.0  | 1.121  |
| <b>Cesarean sections</b>      |        |        |      |      |        |
| DIE                           |        |        |      |      |        |
| OE                            | 0.357  | 0.0    | 0.0  | 2.0  | 0.663  |
| SE                            | 0.255  | 0.0    | 0.0  | 2.0  | 0.570  |
| CG                            | 1.43   | 1.0    | 0.0  | 3.0  | 0.679  |
|                               | 0.333  | 0.0    | 0.0  | 3.0  | 0.692  |
| <b>Misscariages</b>           |        |        |      |      |        |
| DIE                           | 0.357  | 0.0    | 0.0  | 3.0  | 0.842  |
| OE                            | 0.404  | 0.0    | 0.0  | 3.0  | 0.681  |
| SE                            | 0.4    | 0.0    | 0.0  | 2.0  | 0.675  |
| CG                            | 0.606  | 0.0    | 0.0  | 4.0  | 0.933  |

Characteristics of the studied population ( $p < 0.05$  for age between the control group (CG) and the endometriosis group (OE) – these difference could not be avoided due to ethical reasons.
