# Supplementary figures and images for: miR 31-3p Has the Highest Expression in Cesarean Scar Endometriosis
Source: MDPI journal article supplement (doi:10.3390/ijms23094660), 2022-04-22

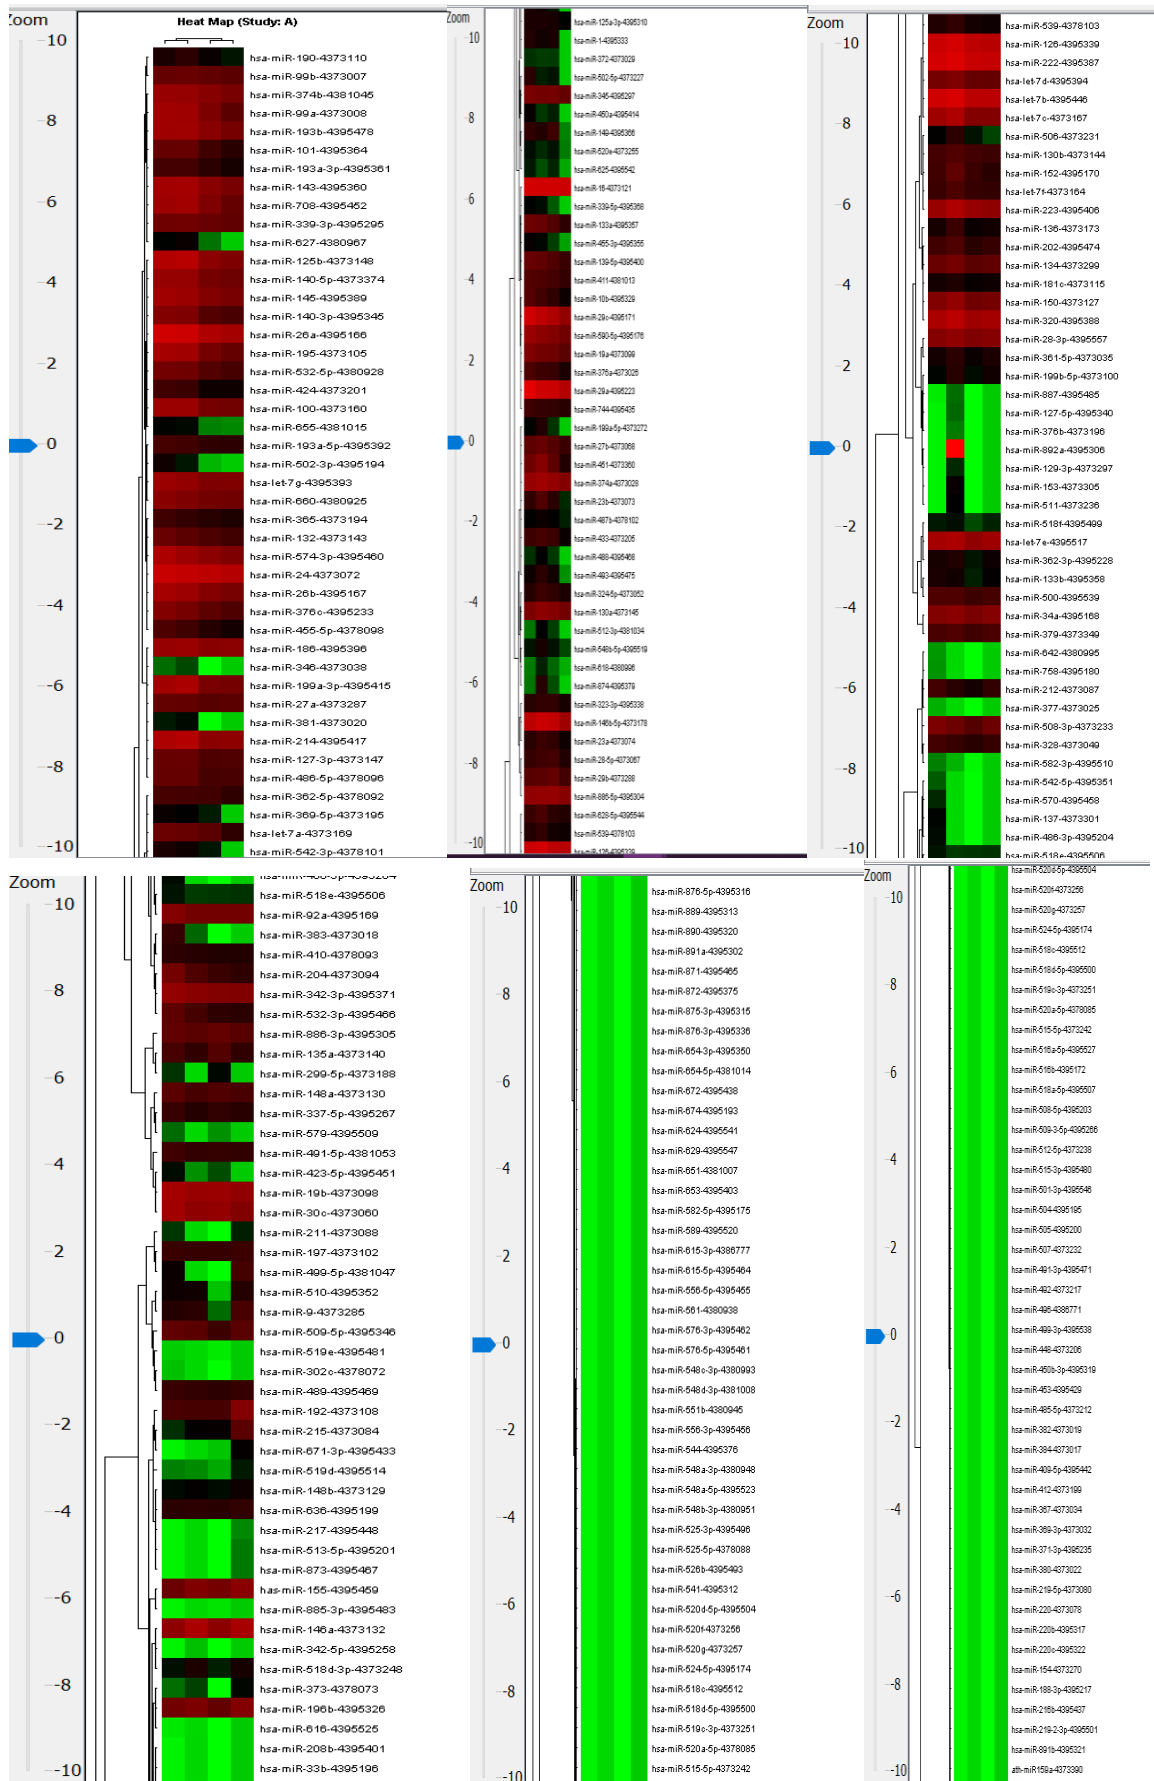

Supplement: s1 [file s1]
